# Supplementary material
Source: PubMed Central journal article supplement (PMC10111212)
Supplement: NIHMS1888500-supplement-Supplementary_Material.pdf [file NIHMS1888500-supplement-Supplementary_Material.pdf]

## SUPPLEMENTAL MATERIALS for “Identification of Novel Genes Mediating Circulating Fibrinogen Levels”

Dre’Von A. Dobson, Lori A. Holle, Feng-Chang Lin, Jennifer E. Huffman, James P. Luyendyk, Matthew J. Flick, Nicholas L. Smith, Paul S. de Vries, Alanna C. Morrison, Alisa S. Wolberg

**Supplemental Table 1. siRNAs used in the study**

| Gene Target | Catalog # | siRNA ID # | Lot #    |
|-------------|-----------|------------|----------|
| FGA         | 4392420   | S534251    | ASO2EY93 |
| FGB         | 4392420   | S5119      | ASO2DYPO |
| FGG         | 4392420   | S5181      | ASOEMXU  |
| IL6R        | AM16708   | 106148     | ASOCNEW  |
| EEPD1       | 4392420   | S37411     | ASO2FL0E |
| COLEC11     | 4392420   | S35371     | ASO2GLZG |
| IRF1        | 4392420   | S7501      | ASO2HNZ4 |
| JMJD1C      | 4392420   | S47943     | ASO2GLZE |
| ATXN2L      | 4392420   | S2257      | ASO2H6RZ |
| GRAMD4      | 4392420   | S23148     | ASO2HNZ3 |
| IFT122      | 4392420   | S31456     | ASO2HMKB |
| PSMG1       | 4392420   | S16408     | ASO2GVPS |
| HDLBP       | 4392420   | S6504      | ASO2EV5F |
| SH2B3       | 4392420   | S532880    | ASO2E92S |
| SEPT2       | 4392420   | S9420      | ASO2E92T |
| SPPL2A      | 4392420   | S39577     | ASO2H7LI |
| SNX13       | 4392420   | S23165     | ASO2H6RY |
| CHD9        | 4392420   | S37052     | ASO2GVPO |
| RAB5C       | 4392420   | S11710     | ASO2GVPU |
| IL1R1       | 4392420   | S7273      | ASO2H7LH |
| PRR12       | 4392420   | S33123     | ASO2HMKA |
| DIP2B       | 4392420   | S33432     | ASO2GYPT |
| SEPT7       | 4392420   | S2742      | ASO2E92U |
| ZFP36L1     | 4392420   | S2090      | ASO2H6SO |
| LIPA        | 4392420   | S532262    | ASO2FL0H |
| TTC17       | 4392420   | S226864    | ASO2H6RT |
| LEPR        | 4392420   | S8138      | ASOGLZD  |
| PDIA5       | AM16708   | 111721     | ASO2CNEX |
| PLEC        | 4392420   | S531205    | ASO2HMK9 |
| SHANK3      | 4392420   | S39916     | ASO2H6RX |
| CPS1        | 4392420   | S3464      | ASO2H6RU |

**Supplemental Table 2. Primers used in the study**

| Gene Target | Forward Sequence        | Reverse Sequence         | Source | Catalog #  |
|-------------|-------------------------|--------------------------|--------|------------|
| RRN18S      | Proprietary             | Proprietary              | Qiagen | QT00199367 |
| GAPDH       | Proprietary             | Proprietary              | Qiagen | QT00079247 |
| FGA         | GTCCCGAGGCAATGGATTTA    | TTGAGGCAGTGTCTGAAGAAG    | IDT    | N/A        |
| FGB         | Proprietary             | Proprietary              | Qiagen | QT00031003 |
| FGG         | TGGAAGTGAAGACTGGAATG    | GGCATATGTTAGGCGGTACTT    | IDT    | N/A        |
| IL6R        | Proprietary             | Proprietary              | Qiagen | QT00023660 |
| EEPDI       | TCTGCCACAATTTGCGTTTC    | CTGAGTCTGCATCCCTCTATTTAC | IDT    | N/A        |
| COLEC11     | GAAAGGAGATTCGCGTGACATAG | AGAGACCTGGTTGTCCATCT     | IDT    | N/A        |
| IRF1        | Proprietary             | Proprietary              | Qiagen | QT00063917 |
| JMJD1C      | CAGACAGAGTACAGTGGGAAAG  | CTCTCGAGGTCGCTTACATAAC   | IDT    | N/A        |
| ATXN2L      | GGAGAAAGAGGTTGATGGTCTG  | GGGTGGTTTGCCTCCTTATC     | IDT    | N/A        |
| GRAMD4      | Proprietary             | Proprietary              | Qiagen | QT00079149 |
| IFT122      | Proprietary             | Proprietary              | Qiagen | QT00071862 |
| PSMG1       | Proprietary             | Proprietary              | Qiagen | QT00069685 |
| HDLBP       | GACCGGGCTTTAAGGAGTTT    | CTCCAACCGGATTTGGGTAAT    | IDT    | N/A        |
| SH2B3       | GGAAGCCCAGAACACTAACA    | GCTGAGAGTAGAAGCAGGATTAG  | IDT    | N/A        |
| SEPT2       | GAGTTCACACTGATGGTGGT    | TTCTGCTGCTCCAGTATG       | IDT    | N/A        |
| SPPL2A      | Proprietary             | Proprietary              | Qiagen | QT00061194 |
| SNX13       | Proprietary             | Proprietary              | Qiagen | QT00079415 |
| CHD9        | TTCTCCTTCCACATCCTCTACT  | GTGAGAAGCATCCCTGGATAAA   | IDT    | N/A        |
| RAB5C       | CAGTGCAGCTACCCTTTCTT    | CCAAAGACCACTCCGAACAA     | IDT    | N/A        |
| IL1R1       | CACCAGCCACTAAGGAGAAA    | CATAAGACAGGAGGCACCTAAA   | IDT    | N/A        |
| PRR12       | Proprietary             | Proprietary              | Qiagen | QT00070651 |
| DIP2B       | GGGACACTTTCTGCTCCTATTC  | GGTTGATCCCTCTGGTCTTTAG   | IDT    | N/A        |
| SEPT7       | CTGACCCACCGCATCTTAAT    | AGCTATCAAGCCGTCTTCC      | IDT    | N/A        |
| ZFP36L1     | Proprietary             | Proprietary              | Qiagen | QT00014805 |
| LIPA        | GCTGTTTGCCTGTGGATTTTC   | GAGGAGACCACCTTCATATTG    | IDT    | N/A        |
| TTC17       | ACAGAAGAAGAGGCCCAAAC    | CAGATCCATGCGAACCTCTAAT   | IDT    | N/A        |
| LEPR        | CCTGGGCACAAGGACTTAAT    | GTTGGGAAGTTGGCACATTG     | IDT    | N/A        |
| PDIA5       | CAAAGGTCTCCTCGCTCATT    | GCCACCTCAGATTTGGAGTAA    | IDT    | N/A        |
| PLEC        | Proprietary             | Proprietary              | Qiagen | QT00053074 |
| SHANK3      | Proprietary             | Proprietary              | Qiagen | QT00208474 |
| CPS1        | CAACCTGGCAGTTCCTCTATAC  | CTCATCCAAGACAGCTGAGAAG   | IDT    | N/A        |

## Supplemental Figure 1

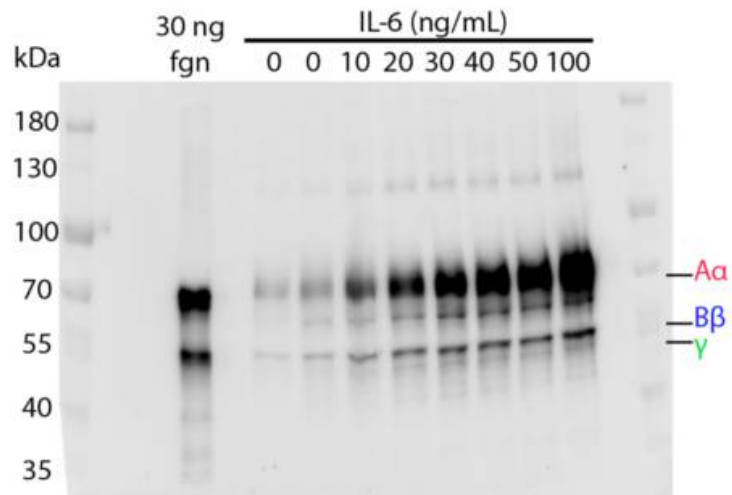

**Supplemental Figure 1. IL-6 induces fibrinogen expression in HepG2 cells.** HepG2 cells were treated with IL-6 at the indicated concentrations for 24 hours. Fibrinogen was detected by immunoblot.

## Supplemental Figure 2

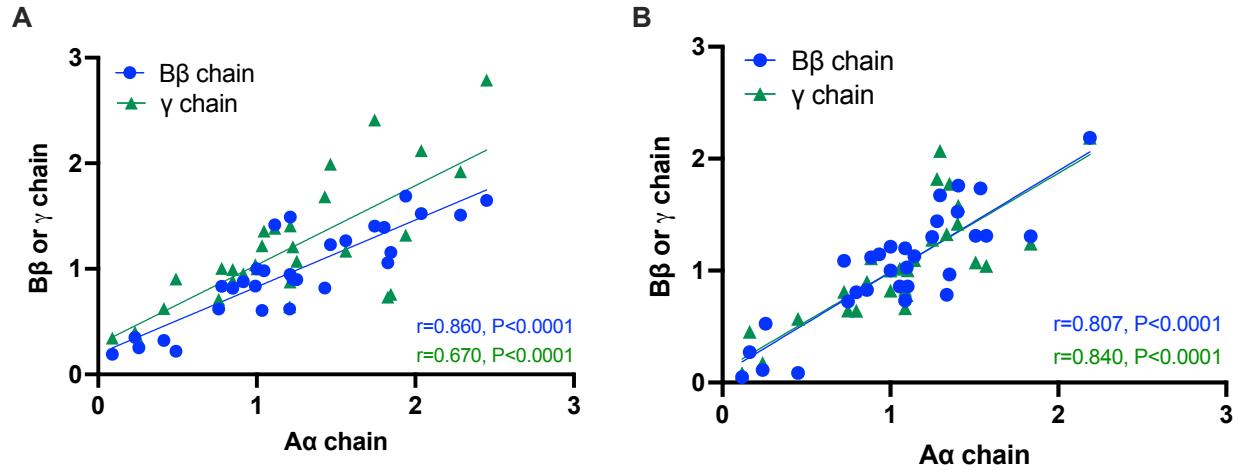

**Supplemental Figure 2. Detection of the fibrinogen A $\alpha$ , B $\beta$ , and  $\gamma$  chains is highly correlated. Spearman correlations in the (A) absence and (B) presence of IL-6.**

### Supplemental Figure 3

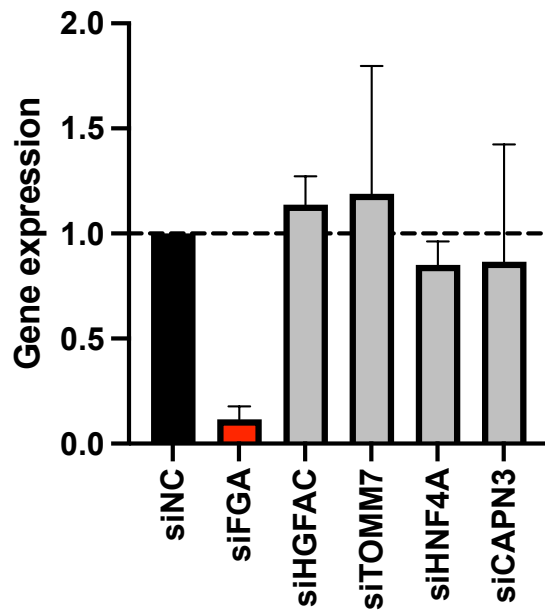

**Supplemental Figure 3. A subset of siRNAs failed to consistently knock down the target gene.** HepG2 cells were transfected with siRNAs against candidate genes in the absence of IL-6. N=2-3 for each siRNA, bars indicate mean + standard deviation, siNC and siFGA are shown for context

Supplemental Figure 4

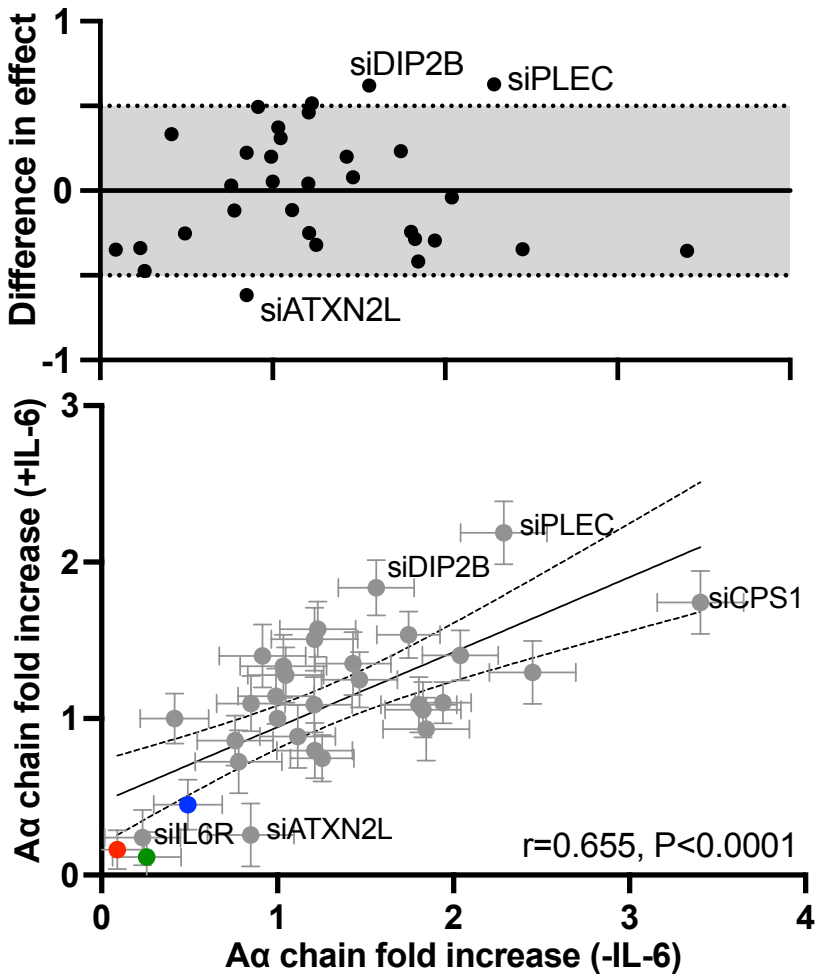

Supplemental Figure 4. Knockdown of the candidate genes has similar effects on constitutive and inducible fibrinogen production. Spearman correlation and residual plots of fibrinogen A $\alpha$  chain production by HepG2 cells after candidate gene knock down. Symbols: *FGA*, red; *FGB*, blue; *FGG*, green
